# Supplementary material for: Visual detection of different metal ions based on the tug of war between triangular Au nanoparticles and metal ions against mercaptans
Source: Royal Society of Chemistry journal article supplement (doi:10.1039/d0ay01845g), 2020-11-25
Supplement: d0ay01845g1.pdf [file d0ay01845g1.pdf]

## Supporting information

# Visual detection of different metal ions based on the tug of war between triangular Au nanoparticles and metal ions against mercaptans

Xianli Chen,<sup>1</sup> Yong Liang<sup>2\*</sup>

<sup>1</sup> Medical College of Shaoguan University, No. 108, Xinhua South Road, Guangdong  
Province, Shaoguan, 512026, China

<sup>2</sup> School of Chemistry and Environment, South China Normal University, Guangzhou,  
510631, China

E-mail: liangy@scnu.edu.cn

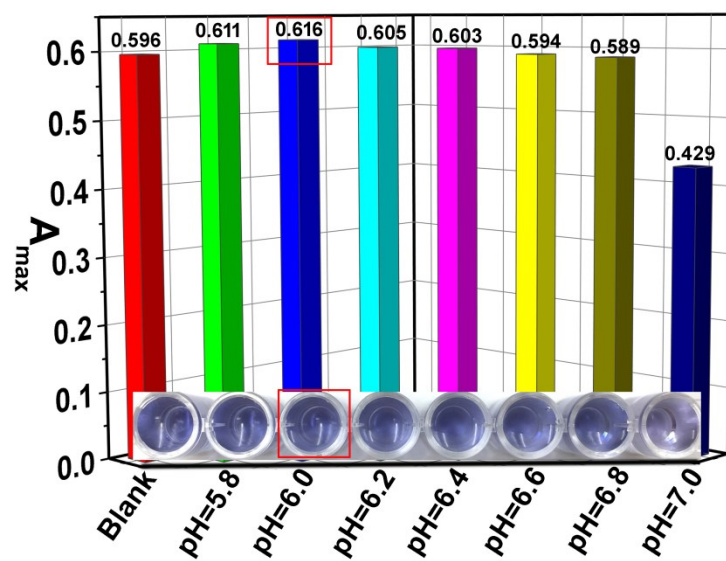

**Fig.S1** The effect of pH concentration on the absorbance of AuNPLs. pH concentration was chosen 6.0.

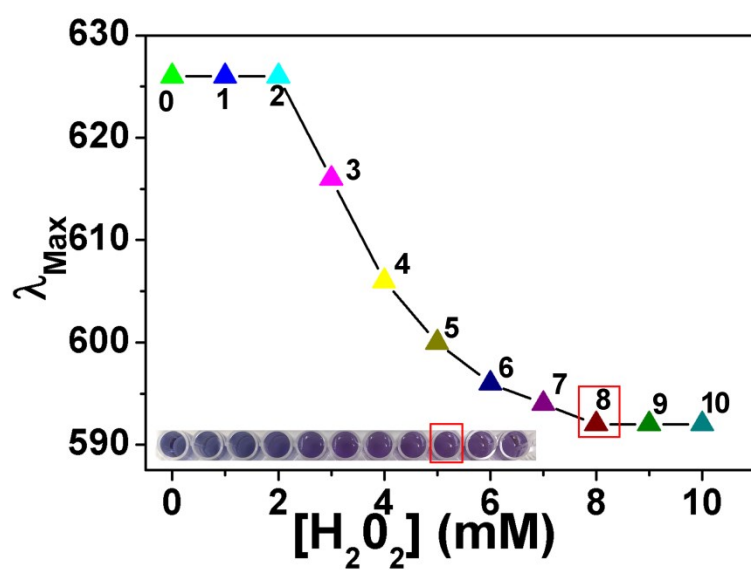

**Fig.S2** The effect of  $\text{H}_2\text{O}_2$  concentration on the absorbance of AuNPLs.  $\text{H}_2\text{O}_2$  concentration was chosen 8 mM.

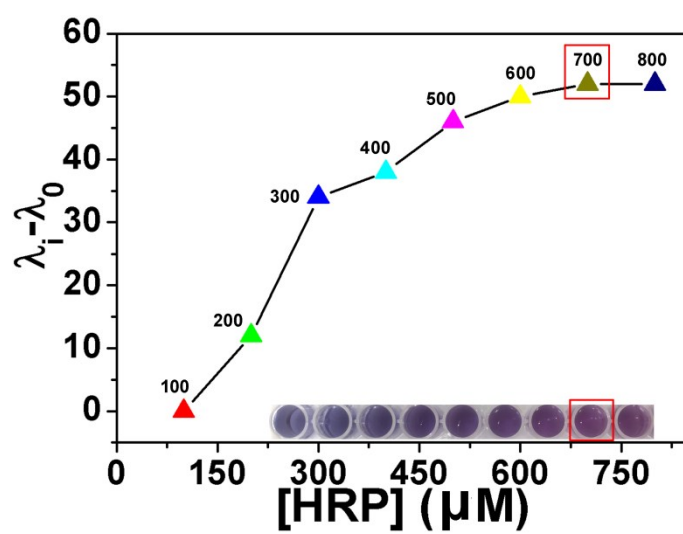

**Fig.S3** The effect of HRP concentration on the absorbance of AuNPLs. HRP concentration was chosen 700  $\mu M$ .

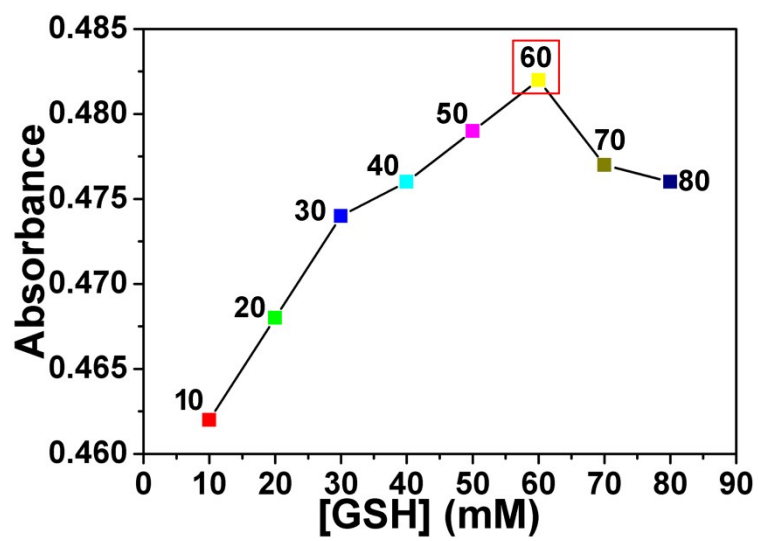

**Fig.S4** The effect of GSH concentration on the absorbance of AuNPLs. GSH concentration was chosen 60  $\mu$ M.

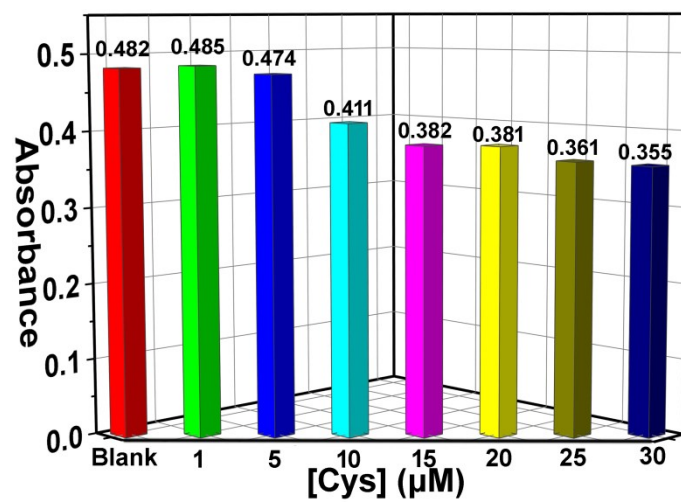

**Fig.S5** The effect of Cys concentration on the absorbance of AuNPLs. Cys concentration was chosen 1μM.

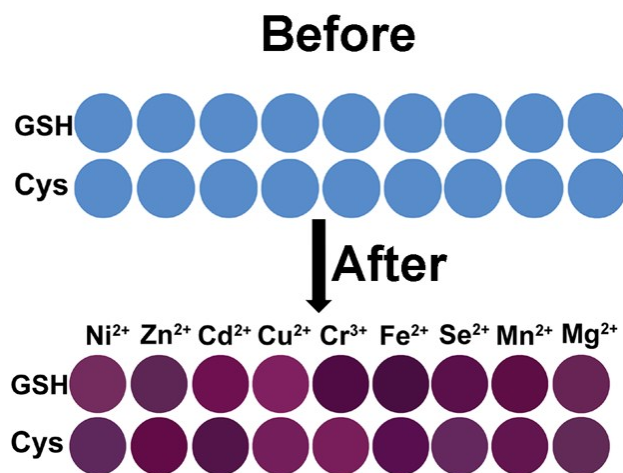

**Fig.S6** The color map of the sensor array in the absence and presence of metal ions at 10 nM.

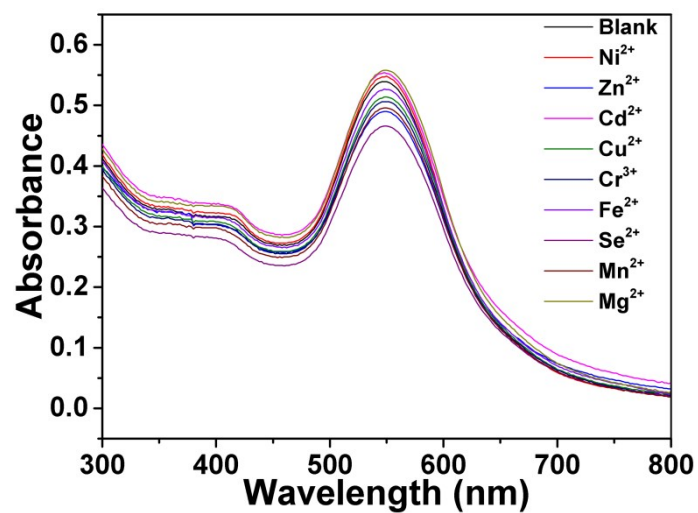

**Fig.S7** UV-vis spectra of the sensing element (GSH) after reaction with the 9 metal ions at 10 nM.



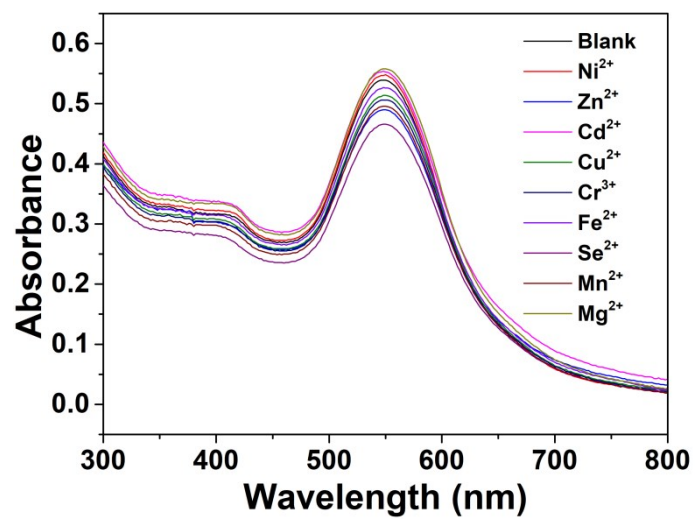

**Fig.S8** UV-vis spectra of the sensing element (Cys) after reaction with the 9 metal ions at 10 nM.

**Table S1** The training matrix of the colorimetric response patterns against 9 metal ions by using this sensor assay at the concentration of 10 nM.

| <b>Metal ions</b>      | <b>A<sub>i</sub>-A<sub>0</sub> GSH</b> | <b>A<sub>i</sub>-A<sub>0</sub> Cys</b> |
|------------------------|----------------------------------------|----------------------------------------|
| <b>Ni<sup>2+</sup></b> | -0.055                                 | -0.037                                 |
| <b>Ni<sup>2+</sup></b> | -0.057                                 | -0.036                                 |
| <b>Ni<sup>2+</sup></b> | -0.054                                 | -0.038                                 |
| <b>Zn<sup>2+</sup></b> | 0.024                                  | 0.004                                  |
| <b>Zn<sup>2+</sup></b> | 0.024                                  | 0.005                                  |
| <b>Zn<sup>2+</sup></b> | 0.026                                  | 0.005                                  |
| <b>Cd<sup>2+</sup></b> | -0.013                                 | -0.101                                 |
| <b>Cd<sup>2+</sup></b> | -0.013                                 | -0.101                                 |
| <b>Cd<sup>2+</sup></b> | -0.013                                 | -0.1                                   |
| <b>Cu<sup>2+</sup></b> | 0.014                                  | -0.069                                 |
| <b>Cu<sup>2+</sup></b> | 0.014                                  | -0.069                                 |
| <b>Cu<sup>2+</sup></b> | 0.014                                  | -0.07                                  |
| <b>Cr<sup>3+</sup></b> | -0.026                                 | -0.03                                  |
| <b>Cr<sup>3+</sup></b> | -0.025                                 | -0.03                                  |
| <b>Cr<sup>3+</sup></b> | -0.026                                 | -0.03                                  |
| <b>Fe<sup>2+</sup></b> | -0.091                                 | -0.058                                 |
| <b>Fe<sup>2+</sup></b> | -0.09                                  | -0.056                                 |
| <b>Fe<sup>2+</sup></b> | -0.091                                 | -0.058                                 |
| <b>Se<sup>2+</sup></b> | -0.034                                 | -0.012                                 |
| <b>Se<sup>2+</sup></b> | -0.033                                 | -0.012                                 |
| <b>Se<sup>2+</sup></b> | -0.033                                 | -0.013                                 |
| <b>Mn<sup>2+</sup></b> | -0.038                                 | -0.081                                 |
| <b>Mn<sup>2+</sup></b> | -0.039                                 | -0.08                                  |
| <b>Mn<sup>2+</sup></b> | -0.039                                 | -0.08                                  |
| <b>Mg<sup>2+</sup></b> | -0.045                                 | 0.012                                  |
| <b>Mg<sup>2+</sup></b> | -0.044                                 | 0.014                                  |
| <b>Mg<sup>2+</sup></b> | -0.043                                 | 0.011                                  |

**Table S2** The training matrix of the colorimetric response patterns against 9 metal ions by using this sensor assay at the concentration of 50 nM.

| <b>Metal ions</b>      | $A_i-A_0$ GSH | $A_i-A_0$ Cys |
|------------------------|---------------|---------------|
| <b>Ni<sup>2+</sup></b> | -0.027        | -0.073        |
| <b>Ni<sup>2+</sup></b> | -0.027        | -0.07         |
| <b>Ni<sup>2+</sup></b> | -0.028        | -0.073        |
| <b>Zn<sup>2+</sup></b> | -0.046        | -0.033        |
| <b>Zn<sup>2+</sup></b> | -0.046        | -0.033        |
| <b>Zn<sup>2+</sup></b> | -0.047        | -0.034        |
| <b>Cd<sup>2+</sup></b> | 0.009         | -0.042        |
| <b>Cd<sup>2+</sup></b> | 0.011         | -0.04         |
| <b>Cd<sup>2+</sup></b> | 0.01          | -0.041        |
| <b>Cu<sup>2+</sup></b> | 0.014         | -0.011        |
| <b>Cu<sup>2+</sup></b> | 0.017         | -0.009        |
| <b>Cu<sup>2+</sup></b> | 0.017         | -0.009        |
| <b>Cr<sup>3+</sup></b> | 0.022         | -0.061        |
| <b>Cr<sup>3+</sup></b> | 0.024         | -0.059        |
| <b>Cr<sup>3+</sup></b> | 0.022         | -0.061        |
| <b>Fe<sup>2+</sup></b> | -0.088        | -0.051        |
| <b>Fe<sup>2+</sup></b> | -0.088        | -0.049        |
| <b>Fe<sup>2+</sup></b> | -0.088        | -0.05         |
| <b>Se<sup>2+</sup></b> | -0.031        | -0.098        |
| <b>Se<sup>2+</sup></b> | -0.031        | -0.098        |
| <b>Se<sup>2+</sup></b> | -0.031        | -0.1          |
| <b>Mn<sup>2+</sup></b> | -0.057        | -0.09         |
| <b>Mn<sup>2+</sup></b> | -0.054        | -0.09         |
| <b>Mn<sup>2+</sup></b> | -0.057        | -0.089        |
| <b>Mg<sup>2+</sup></b> | 0.033         | -0.023        |
| <b>Mg<sup>2+</sup></b> | 0.035         | -0.022        |
| <b>Mg<sup>2+</sup></b> | 0.034         | -0.024        |

**Table S3** The training matrix of the colorimetric response patterns against 9 metal ions by using this sensor assay at the concentration of 100 nM.

| <b>Metal ions</b>      | $A_i-A_0$ GSH | $A_i-A_0$ Cys |
|------------------------|---------------|---------------|
| <b>Ni<sup>2+</sup></b> | 0.004         | 0.028         |
| <b>Ni<sup>2+</sup></b> | 0.006         | 0.031         |
| <b>Ni<sup>2+</sup></b> | 0.004         | 0.028         |
| <b>Zn<sup>2+</sup></b> | -0.009        | 0.058         |
| <b>Zn<sup>2+</sup></b> | -0.009        | 0.059         |
| <b>Zn<sup>2+</sup></b> | -0.009        | 0.058         |
| <b>Cd<sup>2+</sup></b> | 0.069         | -0.021        |
| <b>Cd<sup>2+</sup></b> | 0.07          | -0.021        |
| <b>Cd<sup>2+</sup></b> | 0.068         | -0.022        |
| <b>Cu<sup>2+</sup></b> | 0.042         | 0.044         |
| <b>Cu<sup>2+</sup></b> | 0.042         | 0.045         |
| <b>Cu<sup>2+</sup></b> | 0.042         | 0.043         |
| <b>Cr<sup>3+</sup></b> | -0.043        | 0.078         |
| <b>Cr<sup>3+</sup></b> | -0.043        | 0.079         |
| <b>Cr<sup>3+</sup></b> | -0.043        | 0.078         |
| <b>Fe<sup>2+</sup></b> | 0.022         | 0.063         |
| <b>Fe<sup>2+</sup></b> | 0.022         | 0.066         |
| <b>Fe<sup>2+</sup></b> | 0.022         | 0.065         |
| <b>Se<sup>2+</sup></b> | 0.011         | -0.038        |
| <b>Se<sup>2+</sup></b> | 0.013         | -0.037        |
| <b>Se<sup>2+</sup></b> | 0.011         | -0.039        |
| <b>Mn<sup>2+</sup></b> | -0.024        | 0.007         |
| <b>Mn<sup>2+</sup></b> | -0.024        | 0.008         |
| <b>Mn<sup>2+</sup></b> | -0.024        | 0.007         |
| <b>Mg<sup>2+</sup></b> | 0.03          | 0.069         |
| <b>Mg<sup>2+</sup></b> | 0.032         | 0.072         |
| <b>Mg<sup>2+</sup></b> | 0.031         | 0.069         |

**Table S4** The training matrix of the colorimetric response patterns against 9 metal ions by using this sensor assay at the concentration of 300 nM.

| <b>Metal ions</b>      | $A_i - A_0$ GSH | $A_i - A_0$ Cys |
|------------------------|-----------------|-----------------|
| <b>Ni<sup>2+</sup></b> | 0.006           | 0.009           |
| <b>Ni<sup>2+</sup></b> | 0.002           | 0.01            |
| <b>Ni<sup>2+</sup></b> | 0.002           | 0.009           |
| <b>Zn<sup>2+</sup></b> | 0.069           | -0.049          |
| <b>Zn<sup>2+</sup></b> | 0.066           | -0.045          |
| <b>Zn<sup>2+</sup></b> | 0.066           | -0.047          |
| <b>Cd<sup>2+</sup></b> | 0.02            | 0.015           |
| <b>Cd<sup>2+</sup></b> | 0.02            | 0.016           |
| <b>Cd<sup>2+</sup></b> | 0.02            | 0.015           |
| <b>Cu<sup>2+</sup></b> | 0.014           | -0.025          |
| <b>Cu<sup>2+</sup></b> | 0.012           | -0.023          |
| <b>Cu<sup>2+</sup></b> | 0.012           | -0.026          |
| <b>Cr<sup>3+</sup></b> | 0.025           | -0.033          |
| <b>Cr<sup>3+</sup></b> | 0.022           | -0.031          |
| <b>Cr<sup>3+</sup></b> | 0.021           | -0.034          |
| <b>Fe<sup>2+</sup></b> | 0.051           | -0.012          |
| <b>Fe<sup>2+</sup></b> | 0.048           | -0.012          |
| <b>Fe<sup>2+</sup></b> | 0.049           | -0.011          |
| <b>Se<sup>2+</sup></b> | 0.061           | -0.018          |
| <b>Se<sup>2+</sup></b> | 0.059           | -0.017          |
| <b>Se<sup>2+</sup></b> | 0.06            | -0.017          |
| <b>Mn<sup>2+</sup></b> | 0.033           | -0.043          |
| <b>Mn<sup>2+</sup></b> | 0.031           | -0.042          |
| <b>Mn<sup>2+</sup></b> | 0.028           | -0.043          |
| <b>Mg<sup>2+</sup></b> | 0.046           | 0.019           |
| <b>Mg<sup>2+</sup></b> | 0.046           | 0.021           |
| <b>Mg<sup>2+</sup></b> | 0.043           | 0.021           |

**Table S5** The training matrix of the colorimetric response patterns against 9 metal ions by using this sensor assay at the concentration of 500 nM.

| <b>Metal ions</b>      | $A_i - A_0$ GSH | $A_i - A_0$ Cys |
|------------------------|-----------------|-----------------|
| <b>Ni<sup>2+</sup></b> | -0.009          | -0.032          |
| <b>Ni<sup>2+</sup></b> | -0.007          | -0.032          |
| <b>Ni<sup>2+</sup></b> | -0.011          | -0.03           |
| <b>Zn<sup>2+</sup></b> | 0.011           | 0.04            |
| <b>Zn<sup>2+</sup></b> | 0.011           | 0.041           |
| <b>Zn<sup>2+</sup></b> | 0.01            | 0.041           |
| <b>Cd<sup>2+</sup></b> | 0.052           | -0.019          |
| <b>Cd<sup>2+</sup></b> | 0.052           | -0.02           |
| <b>Cd<sup>2+</sup></b> | 0.051           | -0.018          |
| <b>Cu<sup>2+</sup></b> | 0.008           | -0.012          |
| <b>Cu<sup>2+</sup></b> | 0.008           | -0.011          |
| <b>Cu<sup>2+</sup></b> | 0.005           | -0.01           |
| <b>Cr<sup>3+</sup></b> | 0.015           | 0.008           |
| <b>Cr<sup>3+</sup></b> | 0.017           | 0.011           |
| <b>Cr<sup>3+</sup></b> | 0.016           | 0.013           |
| <b>Fe<sup>2+</sup></b> | 0.02            | -0.005          |
| <b>Fe<sup>2+</sup></b> | 0.02            | -0.005          |
| <b>Fe<sup>2+</sup></b> | 0.019           | -0.005          |
| <b>Se<sup>2+</sup></b> | 0.06            | -0.009          |
| <b>Se<sup>2+</sup></b> | 0.06            | -0.009          |
| <b>Se<sup>2+</sup></b> | 0.06            | -0.007          |
| <b>Mn<sup>2+</sup></b> | 0.075           | -0.003          |
| <b>Mn<sup>2+</sup></b> | 0.076           | -0.003          |
| <b>Mn<sup>2+</sup></b> | 0.074           | -0.003          |
| <b>Mg<sup>2+</sup></b> | 0.029           | 0.003           |
| <b>Mg<sup>2+</sup></b> | 0.033           | 0.005           |
| <b>Mg<sup>2+</sup></b> | 0.03            | 0.006           |

**Table S6** The linear relationship of different concentration of Cu<sup>2+</sup>

| <b>Concentration (nM)</b> | <b>A<sub>i</sub>-A<sub>0</sub> GSH</b> | <b>A<sub>i</sub>-A<sub>0</sub> Cys</b> |
|---------------------------|----------------------------------------|----------------------------------------|
| 50                        | 0.067                                  | 0.065                                  |
| 50                        | 0.065                                  | 0.065                                  |
| 50                        | 0.065                                  | 0.066                                  |
| 100                       | 0.074                                  | 0.096                                  |
| 100                       | 0.075                                  | 0.097                                  |
| 100                       | 0.077                                  | 0.095                                  |
| 300                       | 0.107                                  | 0.112                                  |
| 300                       | 0.105                                  | 0.114                                  |
| 300                       | 0.107                                  | 0.114                                  |
| 500                       | 0.122                                  | 0.138                                  |
| 500                       | 0.121                                  | 0.14                                   |
| 500                       | 0.123                                  | 0.139                                  |

**Table S7** The linear relationship of different concentration of Cd<sup>2+</sup>

| <b>Concentration (nM)</b> | <b>A<sub>i</sub>-A<sub>0</sub> GSH</b> | <b>A<sub>i</sub>-A<sub>0</sub> Cys</b> |
|---------------------------|----------------------------------------|----------------------------------------|
| 50                        | 0.098                                  | 0.083                                  |
| 50                        | 0.101                                  | 0.086                                  |
| 50                        | 0.1                                    | 0.082                                  |
| 100                       | 0.128                                  | 0.113                                  |
| 100                       | 0.129                                  | 0.115                                  |
| 100                       | 0.13                                   | 0.113                                  |
| 300                       | 0.157                                  | 0.141                                  |
| 300                       | 0.161                                  | 0.141                                  |
| 300                       | 0.161                                  | 0.14                                   |
| 500                       | 0.189                                  | 0.172                                  |
| 500                       | 0.19                                   | 0.172                                  |
| 500                       | 0.189                                  | 0.17                                   |



**Table S8** The linear relationship of different concentration of Ni<sup>2+</sup>

| <b>Concentration (nM)</b> | <b>A<sub>i</sub>-A<sub>0</sub> GSH</b> | <b>A<sub>i</sub>-A<sub>0</sub> Cys</b> |
|---------------------------|----------------------------------------|----------------------------------------|
| 50                        | -0.055                                 | -0.037                                 |
| 50                        | -0.057                                 | -0.036                                 |
| 50                        | -0.054                                 | -0.038                                 |
| 100                       | -0.009                                 | -0.032                                 |
| 100                       | -0.007                                 | -0.032                                 |
| 100                       | -0.011                                 | -0.03                                  |
| 300                       | 0.006                                  | 0.009                                  |
| 300                       | 0.002                                  | 0.01                                   |
| 300                       | 0.002                                  | 0.009                                  |
| 500                       | 0.004                                  | 0.028                                  |
| 500                       | 0.006                                  | 0.031                                  |
| 500                       | 0.004                                  | 0.028                                  |

**Table S9** The linear relationship of different concentration of Zn<sup>2+</sup>

| <b>Concentration (nM)</b> | <b>A<sub>i</sub>-A<sub>0</sub> GSH</b> | <b>A<sub>i</sub>-A<sub>0</sub> Cys</b> |
|---------------------------|----------------------------------------|----------------------------------------|
| 50                        | 0.042                                  | 0.05                                   |
| 50                        | 0.043                                  | 0.05                                   |
| 50                        | 0.041                                  | 0.049                                  |
| 100                       | 0.084                                  | 0.108                                  |
| 100                       | 0.085                                  | 0.111                                  |
| 100                       | 0.084                                  | 0.108                                  |
| 300                       | 0.121                                  | 0.148                                  |
| 300                       | 0.124                                  | 0.151                                  |
| 300                       | 0.12                                   | 0.147                                  |
| 500                       | 0.156                                  | 0.2                                    |
| 500                       | 0.16                                   | 0.202                                  |
| 500                       | 0.156                                  | 0.199                                  |

**Table S10** The training matrix of the colorimetric response patterns against the mixture of 2, 3, 4, and 5 kinds of metal ions at 100 nM by using this sensor assay.

| <b>Metal ions</b>                                                                                        | <b>A<sub>i</sub>-A<sub>0</sub> GSH</b> | <b>A<sub>i</sub>-A<sub>0</sub> Cys</b> |
|----------------------------------------------------------------------------------------------------------|----------------------------------------|----------------------------------------|
| <b>Ni<sup>2+</sup>: Zn<sup>2+</sup>=5:5</b>                                                              | 0.025                                  | 0.01                                   |
| <b>Ni<sup>2+</sup>: Zn<sup>2+</sup>=5:5</b>                                                              | 0.025                                  | 0.011                                  |
| <b>Ni<sup>2+</sup>: Zn<sup>2+</sup>=5:5</b>                                                              | 0.024                                  | 0.009                                  |
| <b>Cu<sup>2+</sup>: Fe<sup>2+</sup>=4:6</b>                                                              | 0.033                                  | -0.015                                 |
| <b>Cu<sup>2+</sup>: Fe<sup>2+</sup>=4:6</b>                                                              | 0.032                                  | -0.015                                 |
| <b>Cu<sup>2+</sup>: Fe<sup>2+</sup>=4:6</b>                                                              | 0.034                                  | -0.015                                 |
| <b>Se<sup>2+</sup>: Mg<sup>2+</sup>=3:7</b>                                                              | -0.079                                 | -0.074                                 |
| <b>Se<sup>2+</sup>: Mg<sup>2+</sup>=3:7</b>                                                              | -0.079                                 | -0.074                                 |
| <b>Se<sup>2+</sup>: Mg<sup>2+</sup>=3:7</b>                                                              | -0.078                                 | -0.074                                 |
| <b>Cd<sup>2+</sup>: Cr<sup>3+</sup>: Mn<sup>2+</sup>=3:3:4</b>                                           | -0.017                                 | -0.028                                 |
| <b>Cd<sup>2+</sup>: Cr<sup>3+</sup>: Mn<sup>2+</sup>=3:3:4</b>                                           | -0.016                                 | -0.028                                 |
| <b>Cd<sup>2+</sup>: Cr<sup>3+</sup>: Mn<sup>2+</sup>=3:3:4</b>                                           | -0.016                                 | -0.029                                 |
| <b>Ni<sup>2+</sup>: Fe<sup>2+</sup>: Mg<sup>2+</sup>=2:3:5</b>                                           | -0.062                                 | -0.089                                 |
| <b>Ni<sup>2+</sup>: Fe<sup>2+</sup>: Mg<sup>2+</sup>=2:3:5</b>                                           | -0.062                                 | -0.087                                 |
| <b>Ni<sup>2+</sup>: Fe<sup>2+</sup>: Mg<sup>2+</sup>=2:3:5</b>                                           | -0.063                                 | -0.088                                 |
| <b>Cu<sup>2+</sup>: Se<sup>2+</sup>: Zn<sup>2+</sup>=4:2:4</b>                                           | -0.047                                 | 0.03                                   |
| <b>Cu<sup>2+</sup>: Se<sup>2+</sup>: Zn<sup>2+</sup>=4:2:4</b>                                           | -0.046                                 | 0.032                                  |
| <b>Cu<sup>2+</sup>: Se<sup>2+</sup>: Zn<sup>2+</sup>=4:2:4</b>                                           | -0.046                                 | 0.031                                  |
| <b>Zn<sup>2+</sup>: Cd<sup>2+</sup>: Cr<sup>3+</sup>:<br/>Cu<sup>2+</sup>=2:2:3:3</b>                    | -0.03                                  | 0.099                                  |
| <b>Zn<sup>2+</sup>: Cd<sup>2+</sup>: Cr<sup>3+</sup>:<br/>Cu<sup>2+</sup>=2:2:3:3</b>                    | -0.03                                  | 0.099                                  |
| <b>Zn<sup>2+</sup>: Cd<sup>2+</sup>: Cr<sup>3+</sup>:<br/>Cu<sup>2+</sup>=2:2:3:3</b>                    | -0.029                                 | 0.098                                  |
| <b>Ni<sup>2+</sup>: Fe<sup>2+</sup>: Se<sup>2+</sup>:<br/>Mg<sup>2+</sup>=3:3:2:2</b>                    | 0.044                                  | 0.083                                  |
| <b>Ni<sup>2+</sup>: Fe<sup>2+</sup>: Se<sup>2+</sup>:<br/>Mg<sup>2+</sup>=3:3:2:2</b>                    | 0.045                                  | 0.083                                  |
| <b>Ni<sup>2+</sup>: Fe<sup>2+</sup>: Se<sup>2+</sup>:<br/>Mg<sup>2+</sup>=3:3:2:2</b>                    | 0.045                                  | 0.083                                  |
| <b>Cu<sup>2+</sup>: Fe<sup>2+</sup>: Cr<sup>3+</sup>: Zn<sup>2+</sup>:<br/>Mn<sup>2+</sup>=2:2:2:2:2</b> | -0.009                                 | -0.047                                 |
| <b>Cu<sup>2+</sup>: Fe<sup>2+</sup>: Cr<sup>3+</sup>: Zn<sup>2+</sup>:<br/>Mn<sup>2+</sup>=2:2:2:2:2</b> | -0.009                                 | -0.047                                 |
| <b>Cu<sup>2+</sup>: Fe<sup>2+</sup>: Cr<sup>3+</sup>: Zn<sup>2+</sup>:<br/>Mn<sup>2+</sup>=2:2:2:2:2</b> | -0.008                                 | -0.047                                 |

**Table S11** The training matrix of the colorimetric response patterns against the 9 metal ions at 50 nM in river water by using this sensor assay.

| <b>Metal ions</b>      | <b>A<sub>i</sub>-A<sub>0</sub> GSH</b> | <b>A<sub>i</sub>-A<sub>0</sub> Cys</b> |
|------------------------|----------------------------------------|----------------------------------------|
| <b>Ni<sup>2+</sup></b> | 0.006                                  | -0.011                                 |
| <b>Ni<sup>2+</sup></b> | 0.006                                  | -0.009                                 |
| <b>Ni<sup>2+</sup></b> | 0.008                                  | -0.011                                 |
| <b>Zn<sup>2+</sup></b> | -0.015                                 | -0.046                                 |
| <b>Zn<sup>2+</sup></b> | -0.018                                 | -0.046                                 |
| <b>Zn<sup>2+</sup></b> | -0.017                                 | -0.046                                 |
| <b>Cd<sup>2+</sup></b> | -0.006                                 | 0.008                                  |
| <b>Cd<sup>2+</sup></b> | -0.008                                 | 0.01                                   |
| <b>Cd<sup>2+</sup></b> | -0.007                                 | 0.009                                  |
| <b>Cu<sup>2+</sup></b> | -0.012                                 | -0.027                                 |
| <b>Cu<sup>2+</sup></b> | -0.011                                 | -0.027                                 |
| <b>Cu<sup>2+</sup></b> | -0.01                                  | -0.027                                 |
| <b>Cr<sup>3+</sup></b> | -0.026                                 | -0.054                                 |
| <b>Cr<sup>3+</sup></b> | -0.028                                 | -0.054                                 |
| <b>Cr<sup>3+</sup></b> | -0.026                                 | -0.055                                 |
| <b>Fe<sup>2+</sup></b> | 0.01                                   | -0.073                                 |
| <b>Fe<sup>2+</sup></b> | 0.008                                  | -0.073                                 |
| <b>Fe<sup>2+</sup></b> | 0.01                                   | -0.074                                 |
| <b>Se<sup>2+</sup></b> | -0.02                                  | -0.058                                 |
| <b>Se<sup>2+</sup></b> | -0.023                                 | -0.058                                 |
| <b>Se<sup>2+</sup></b> | -0.022                                 | -0.058                                 |
| <b>Mn<sup>2+</sup></b> | -0.034                                 | -0.084                                 |
| <b>Mn<sup>2+</sup></b> | -0.036                                 | -0.081                                 |
| <b>Mn<sup>2+</sup></b> | -0.034                                 | -0.083                                 |
| <b>Mg<sup>2+</sup></b> | -0.041                                 | -0.063                                 |
| <b>Mg<sup>2+</sup></b> | -0.043                                 | -0.063                                 |
| <b>Mg<sup>2+</sup></b> | -0.041                                 | -0.064                                 |

**Table S12** The training matrix of the colorimetric response patterns against the 9 metal ions at 50 nM in tap water by using this sensor assay.

| <b>Metal ions</b>      | <b>A<sub>i</sub>-A<sub>0</sub> GSH</b> | <b>A<sub>i</sub>-A<sub>0</sub> Cys</b> |
|------------------------|----------------------------------------|----------------------------------------|
| <b>Ni<sup>2+</sup></b> | -0.009                                 | -0.073                                 |
| <b>Ni<sup>2+</sup></b> | -0.009                                 | -0.07                                  |
| <b>Ni<sup>2+</sup></b> | -0.007                                 | -0.073                                 |
| <b>Zn<sup>2+</sup></b> | 0.02                                   | -0.033                                 |
| <b>Zn<sup>2+</sup></b> | 0.021                                  | -0.033                                 |
| <b>Zn<sup>2+</sup></b> | 0.02                                   | -0.034                                 |
| <b>Cd<sup>2+</sup></b> | -0.021                                 | -0.042                                 |
| <b>Cd<sup>2+</sup></b> | -0.023                                 | -0.04                                  |
| <b>Cd<sup>2+</sup></b> | -0.022                                 | -0.041                                 |
| <b>Cu<sup>2+</sup></b> | 0.006                                  | -0.011                                 |
| <b>Cu<sup>2+</sup></b> | 0.004                                  | -0.009                                 |
| <b>Cu<sup>2+</sup></b> | 0.005                                  | -0.009                                 |
| <b>Cr<sup>3+</sup></b> | -0.035                                 | -0.061                                 |
| <b>Cr<sup>3+</sup></b> | -0.037                                 | -0.059                                 |
| <b>Cr<sup>3+</sup></b> | -0.035                                 | -0.061                                 |
| <b>Fe<sup>2+</sup></b> | -0.016                                 | -0.051                                 |
| <b>Fe<sup>2+</sup></b> | -0.016                                 | -0.049                                 |
| <b>Fe<sup>2+</sup></b> | -0.016                                 | -0.05                                  |
| <b>Se<sup>2+</sup></b> | 0.017                                  | -0.098                                 |
| <b>Se<sup>2+</sup></b> | 0.017                                  | -0.098                                 |
| <b>Se<sup>2+</sup></b> | 0.018                                  | -0.1                                   |
| <b>Mn<sup>2+</sup></b> | 0.01                                   | -0.09                                  |
| <b>Mn<sup>2+</sup></b> | 0.011                                  | -0.09                                  |
| <b>Mn<sup>2+</sup></b> | 0.012                                  | -0.089                                 |
| <b>Mg<sup>2+</sup></b> | -0.027                                 | -0.023                                 |
| <b>Mg<sup>2+</sup></b> | -0.027                                 | -0.022                                 |
| <b>Mg<sup>2+</sup></b> | -0.026                                 | -0.024                                 |
